# Supplementary material for: Alkali to alkaline earth metals: a DFT study of monolayer TiSi2N4 for metal ion batteries
Source: Royal Society of Chemistry journal article supplement (doi:10.1039/d3dt03946c), 2024-01-01
Supplement: d3dt03946c1.pdf [file d3dt03946c1.pdf]

**Supporting Information (SI) for**  
**Alkali to alkaline earth metals: A DFT study of monolayer**  
**TiSi<sub>2</sub>N<sub>4</sub> for metal ion batteries**

**Sheraz Ahmad,<sup>1</sup> H. U. Din,<sup>2,3\*</sup> Cuong Q. Nguyen,<sup>4,5,\*</sup> Son-Tung Nguyen<sup>6</sup>, C.  
Nguyen<sup>7</sup>**

<sup>1</sup>*School of Materials Science and Engineering, Institute of New Energy Material  
Chemistry, Nankai University, Tianjin 300350, P. R. China.*

<sup>2</sup>*Computational Science Research Center, Korea Institute of Science and Technology  
(KIST), Seoul 02792, Republic of Korea.*

<sup>3</sup>*Department of Physics, Bacha Khan University, Charsadda, KP, Pakistan*

<sup>4</sup>*Institute of Research and Development, Duy Tan University, Da Nang 550000,  
Vietnam*

<sup>5</sup>*Faculty of Natural Sciences, Duy Tan University, Da Nang 550000, Vietnam*

<sup>6</sup>*Faculty of Electrical Engineering, Hanoi University of Industry, Hanoi 100000,  
Vietnam*

<sup>7</sup>*Le Quy Don Technical University, Hanoi 10000, Vietnam*

Corresponding authors: H. U. Din ([025264@kist.re.kr](mailto:025264@kist.re.kr)),

C. Q. Nguyen ([nguyenquangcuong3@duytan.edu.vn](mailto:nguyenquangcuong3@duytan.edu.vn))

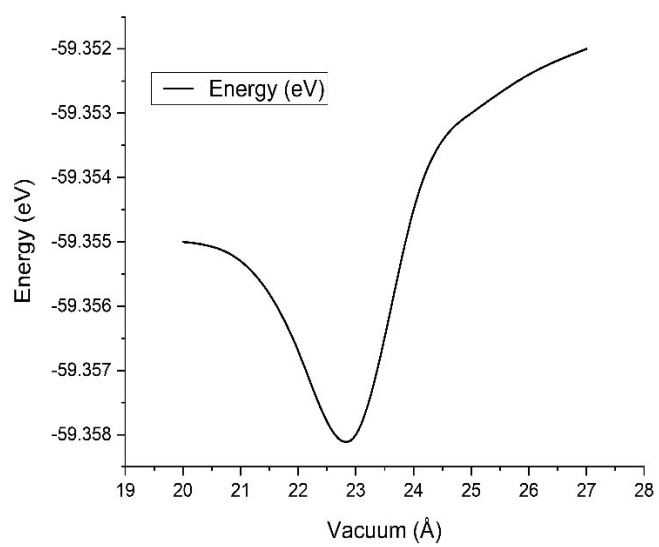

**Figure S1.** Vacuum optimization of monolayer  $\text{TiSi}_2\text{N}_4$

**Table S1.** Lattice parameters ( $a=b$  in Å), PBE and HSE06 band gaps ( $E_g$ ), bond lengths (Å), bond angle ( $\theta$ ), Force constants (N/m), Poisson's ratio, Young's Modulus ( $Y_{2D}$ ), Shear Modulus (G), Formation Enthalpy (eV) and Dipole moment ( $\mu$ ) of monolayer  $TiSi_2N_4$ .

| <b>TiSi<sub>2</sub>N<sub>4</sub></b> | <b>Values</b>    |
|--------------------------------------|------------------|
| a=b (Å)                              | 2.916            |
| PBE band ( $E_g$ )                   | 1.649 (Indirect) |
| HSE06 band ( $E_g$ )                 | 2.611 (Indirect) |
| N-Ti (Å)                             | 2.063            |
| N-Si (Å)                             | 1.75/1.76        |
| N-Ti-N ( $\theta$ )                  | 70.63            |
| N-Si-N ( $\theta$ )                  | 107.07           |
| Ti-N-Si ( $\theta$ )                 | 125.31           |
| $C_{11}$ (N/m)                       | 725.52           |
| $C_{12}$ (N/m)                       | 232.29           |
| $C_{66}$ (N/m)                       | 247.11           |
| Poisson's ratio                      | 0.319            |
| Young's modulus ( $Y_{2D}$ )         | 625.25           |
| Shear Modulus (G)                    | 247.11           |
| Formation Enthalpy                   | -3.298           |
| Dipole moment ( $\mu$ )              | -1.09            |

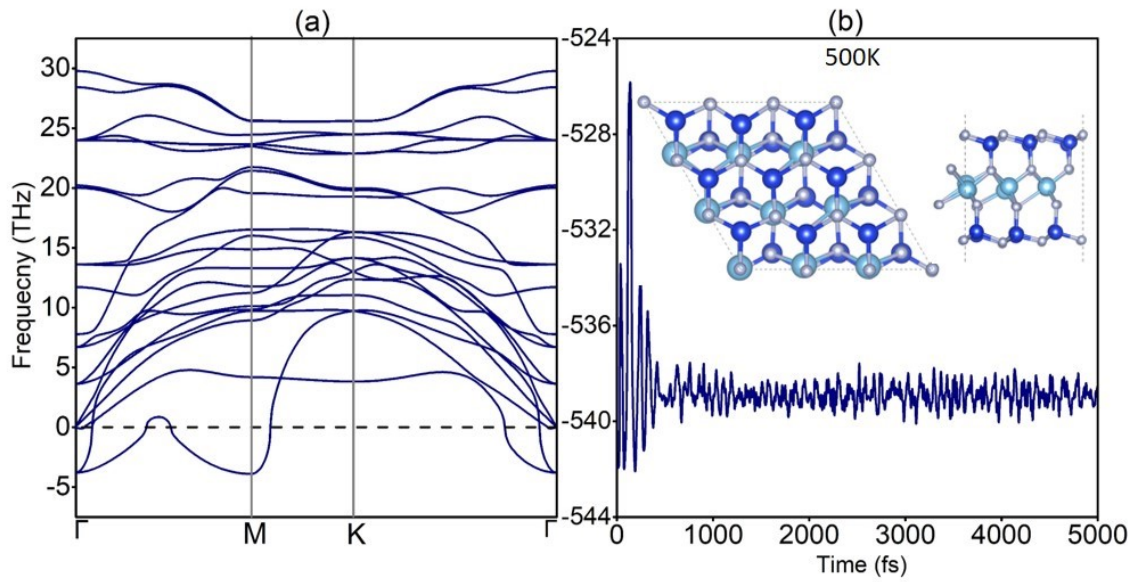

**Figure S2.** (a) Phonon spectra and (b) AIMD simulation for 1T phase of  $\text{TiSi}_2\text{N}_4$  monolayer at 500K for 5000 time steps with inset display the initial and final structures, respectively.

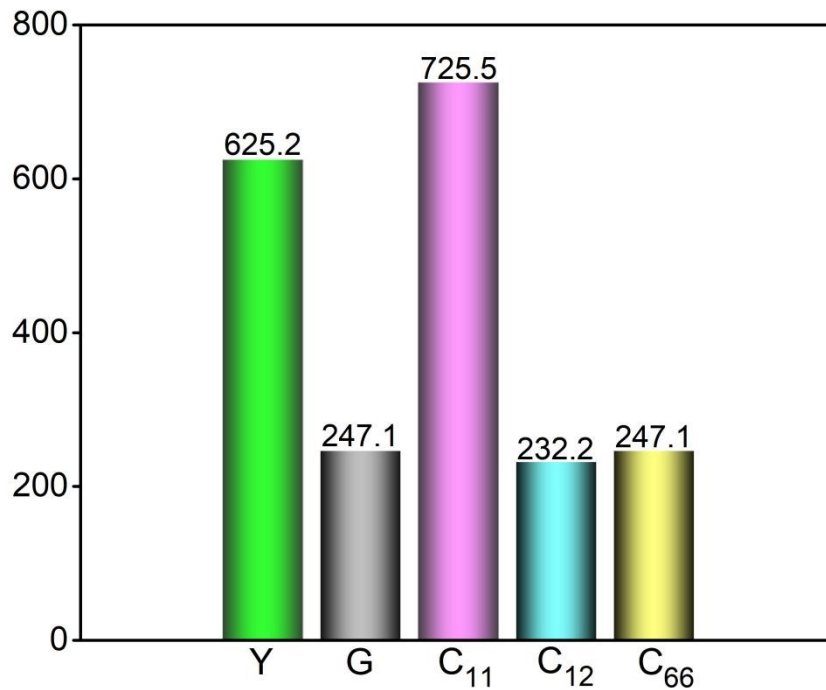

**Figure S3.** Young's Modulus (Y), Shear Modulus (G), and elastic constants  $C_{11}$ ,  $C_{12}$  and  $C_{66}$  for monolayer  $\text{TiSi}_2\text{N}_4$ .

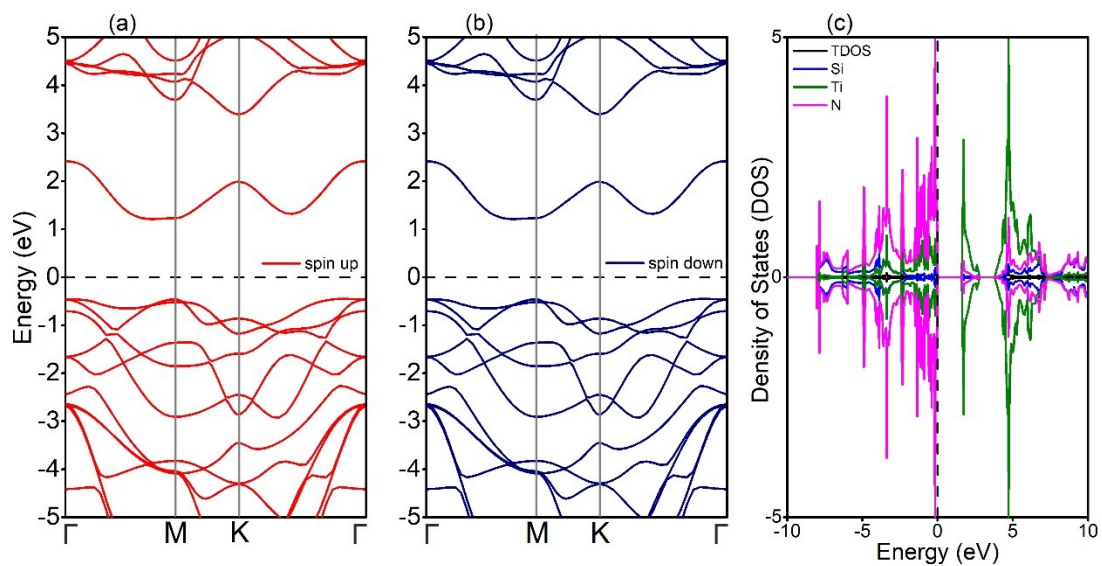

**Figure S4.** Spin polarized band structure of monolayer  $\text{TiSi}_2\text{N}_4$  (a) spin up (b) spin down and (c) density of states DOS.

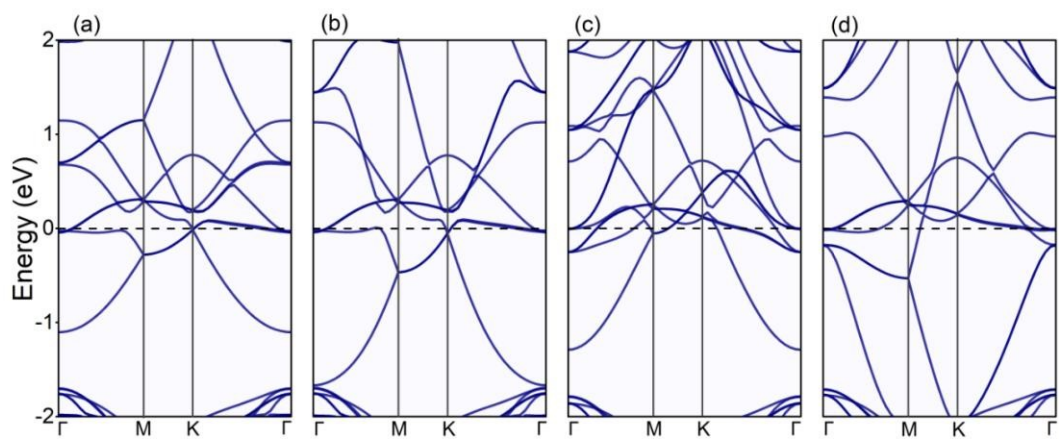

**Figure S5.** Band structure for single (a) Li, (b) Na, (c) K and (d) Mg atom adsorbed on monolayer  $\text{TiSi}_2\text{N}_4$

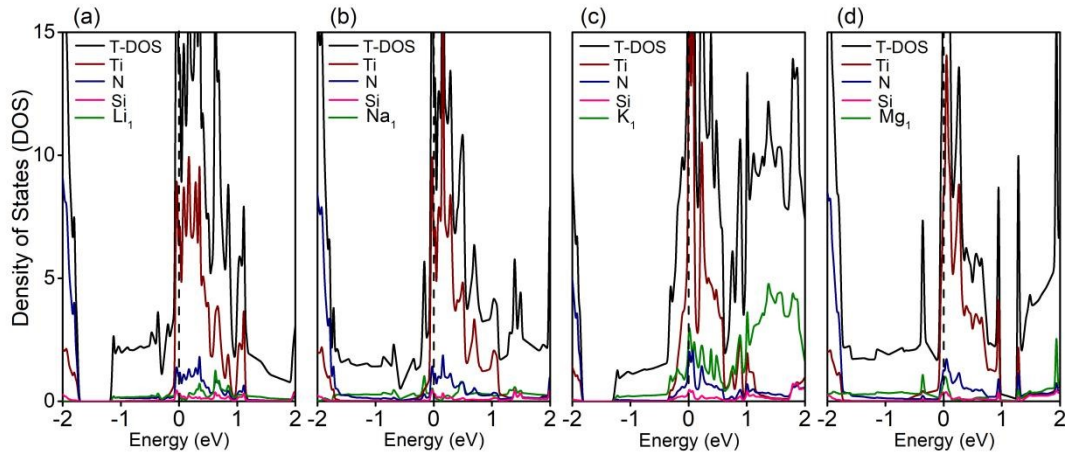

**Figure S6.** Partial Density of states (DOS) for single (a) Li, (b) Na, (c) K and (d) Mg atom adsorbed on  $\text{TiSi}_2\text{N}_4$  monolayer

**Table S2.** Change in lattice parameter ( $a=b$ ) due to adsorption of different layers of metals (Li, Na, K, Mg) atoms of single layer  $\text{Ti}_4\text{Si}_8\text{N}_{16}$ .

| Metals | Pristine | 1 <sup>st</sup> layer | 2 <sup>nd</sup> layer | 3 <sup>rd</sup> layer | 4 <sup>th</sup> layer | 5 <sup>th</sup> layer | 6 <sup>th</sup> layer |
|--------|----------|-----------------------|-----------------------|-----------------------|-----------------------|-----------------------|-----------------------|
| Li     | 5.8325   | 5.8580                | 5.8754                | 5.8755                | 5.8623                | 5.8675                | 5.8598                |
| Na     | 5.8325   | 5.8510                | 5.8469                | 5.9127                | 5.9335                | 5.9503                | 5.9612                |
| K      | 5.8325   | 5.8993                | 5.9780                | 6.0512                | 6.1076                | ----                  | ----                  |
| Mg     | 5.8325   | 5.7435                | 5.8708                | 5.9045                | 5.9047                | 5.9224                | 5.9218                |

**Table S3.** Adsorption energy for single alkali atom at different positions, Diffusion barrier energy, Theoretical Specific Capacity and Open Circuit Voltage (OCV) of  $\text{Ti}_4\text{Si}_8\text{N}_{16}$  monolayer.

| Metals | Adsorption Energy (eV) |         |         |         | Diffusion Barrier (eV) |        |        | TSC<br>mAh/g | OCV <sub>Avg</sub> |
|--------|------------------------|---------|---------|---------|------------------------|--------|--------|--------------|--------------------|
|        | Single atom            |         |         |         | Path-1                 | Path-2 | Path-3 |              |                    |
|        | B                      | N       | Si      | Ti      |                        |        |        |              |                    |
| Li     | -2.471                 | -2.4720 | -2.11   | -2.4722 | 0.339                  | 0.25   | 0.369  | 1004.4       | 0.55               |
| Na     | -1.591                 | -1.288  | -1.443  | -1.600  | 0.146                  | 0.161  | 0.173  | 854.7        | 0.26               |
| Mg     | -0.592                 | -0.593  | -0.5153 | -0.555  | 0.189                  | 0.103  | 0.21   | 492.3        | 0.55               |
| K      | -1.321                 | -1.182  | -1.325  | -1.389  | 0.074                  | 0.135  | 0.086  | 531.5        | -1.30              |

**Table S4.** Adsorption energy for single and multilayer alkali ion metals on  $\text{Ti}_4\text{Si}_8\text{N}_{16}$  monolayer.

| Metals | Adsorption Energy (eV) |         |         |                       |                       |                       |                       |                       |
|--------|------------------------|---------|---------|-----------------------|-----------------------|-----------------------|-----------------------|-----------------------|
|        | 1 <sup>st</sup> layer  |         |         | 2 <sup>nd</sup> layer | 3 <sup>rd</sup> Layer | 4 <sup>th</sup> Layer | 5 <sup>th</sup> Layer | 6 <sup>th</sup> layer |
|        | N-site                 | Si-site | Ti-site |                       |                       |                       |                       |                       |
| Li     | -2.21                  | -1.40   | -1.981  | -4.42                 | -5.28                 | -6.08                 | -5.08                 | -6.28                 |
| Na     | -2.07                  | -1.96   | -2.10   | -4.19                 | -4.53                 | -3.93                 | -4.60                 | 1.511                 |
| Mg     | -2.75                  | -1.43   | -1.64   | -5.43                 | -5.08                 | -4.79                 | -4.63                 | -0.83                 |
| K      | -3.25                  | -3.88   | -4.25   | -8.46                 | -6.08                 | -8.72                 | ---                   | ---                   |

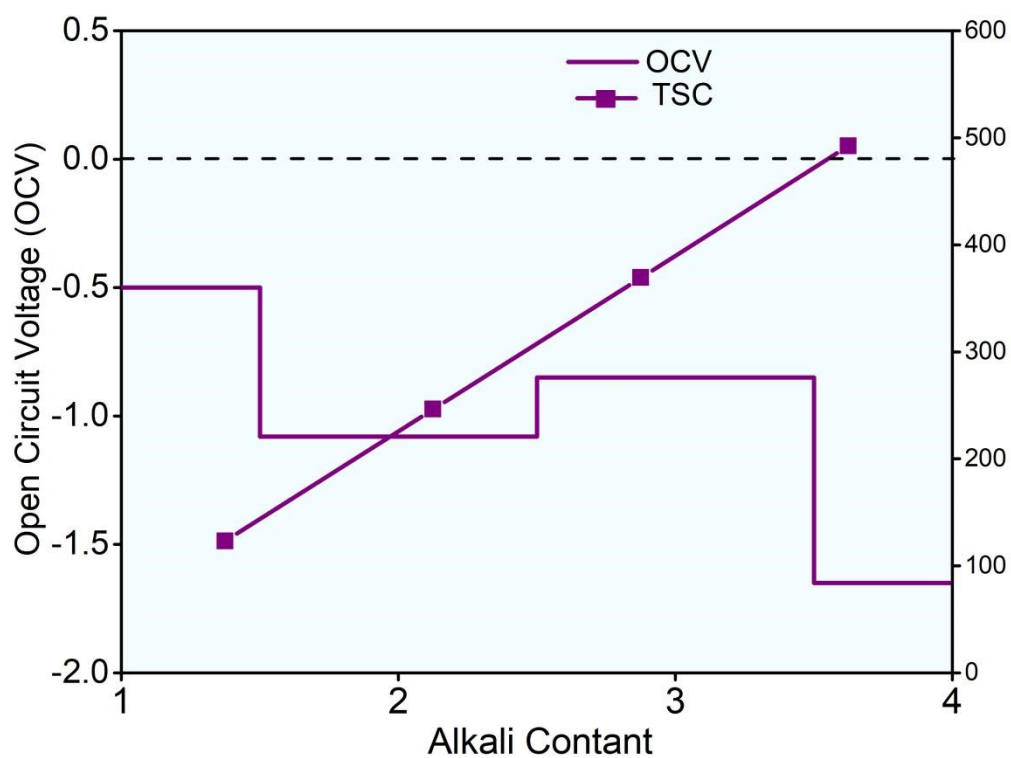

**Figure S7.** Open Circuit Voltage (OCV) and Theoretical Specific Capacity (TSC) of K adsorption on  $\text{TiSi}_2\text{N}_4$ .
